# Supplementary material for: Drought Yield QTL (qDTY) with Consistent Effects on Morphological and Agronomical Traits of Two Populations of New Rice (Oryza sativa) Lines
Source: PubMed Central journal article supplement (PMC6630983; doi:10.3390/plants8060186), 2019-06-24
Supplement: plants-08-00186-s001.pdf [file plants-08-00186-s001.pdf]

Supplementary Table 1. Morpho-physiological and agronomical traits of Selected MRQ74 PLs under RS

| Genotypes | <i>qDTY/s</i>                                            | RW    | RL     | LR     | GW     | GL     |
|-----------|----------------------------------------------------------|-------|--------|--------|--------|--------|
| UKM-G16   | <i>qDTY</i> <sub>12.1</sub> + <i>qDTY</i> <sub>3.1</sub> | 2.53a | 14.03a | 1.50b  | 20.90b | 0.97a  |
| UKM-G18   | <i>qDTY</i> <sub>2.2</sub>                               | 2.10a | 12.05a | 1.50b  | 18.70c | 0.82b  |
| UKM-G17   | <i>qDTY</i> <sub>12.1</sub> + <i>qDTY</i> <sub>2.2</sub> | 2.91a | 16.38a | 2.00ab | 21.60b | 0.89ab |
| MRQ74     | No <i>qDTY</i>                                           | 3.66a | 13.88a | 3.00a  | 17.20d | 0.89ab |

Same letters in each column indicate non-significant different (LSD,  $p < 0.05$ ), leaf rolling (LR), root weight (RW) in g, root length (RL) in cm, grain weight (GW) in g, grain length (GL) in cm.

Supplementary Table 2. Morpho-physiological and agronomical traits of Selected MRQ74 PLs under NS

| Genotypes | <i>qDTY/s</i>                                            | RL     | RW    | GW      | GL    |
|-----------|----------------------------------------------------------|--------|-------|---------|-------|
| UKM-G16   | <i>qDTY</i> <sub>12.1</sub> + <i>qDTY</i> <sub>3.1</sub> | 11.33b | 2.32a | 19.40bc | 1.05a |
| UKM-G18   | <i>qDTY</i> <sub>2.2</sub>                               | 6.40c  | 1.46b | 19.10c  | 3.45a |
| UKM-G17   | <i>qDTY</i> <sub>12.1</sub> + <i>qDTY</i> <sub>2.2</sub> | 13.58e | 2.72e | 21.00ab | 0.85a |
| MRQ74     | No <i>qDTY</i>                                           | 14.17a | 2.81f | 18.40c  | 0.85a |

Same letters in each column indicate non-significant different (LSD,  $p < 0.05$ ), root weight (RW) in g, root length (RL) in cm, grain weight (GW) in g, grain length (GL) in cm.

Supplementary Table 3. Morpho-physiological and agronomical traits of Selected MR219 PLs under RS

| Genotypes | <i>qDTY/s</i>                                                                         | RL     | RW    | GW     |
|-----------|---------------------------------------------------------------------------------------|--------|-------|--------|
| UKM-G12   | <i>qDTY</i> <sub>12.1</sub> + <i>qDTY</i> <sub>3.1</sub> + <i>qDTY</i> <sub>2.2</sub> | 12.23a | 0.69a | 1.71bc |
| UKM-G13   | <i>qDTY</i> <sub>12.1</sub> + <i>qDTY</i> <sub>3.1</sub> + <i>qDTY</i> <sub>2.2</sub> | 13.08a | 0.74a | 2.19a  |
| UKM-G15   | <i>qDTY</i> <sub>3.1</sub> + <i>qDTY</i> <sub>2.2</sub>                               | 10.75a | 0.24a | 2.17a  |
| UKM-G14   | <i>qDTY</i> <sub>12.1</sub> + <i>qDTY</i> <sub>3.1</sub>                              | 10.75a | 0.16a | 1.88ab |
| MR219     | No <i>qDTY</i>                                                                        | 13.38a | 0.82a | 1.35c  |

Same letters in each column indicate non-significant different (LSD,  $p < 0.05$ ), root weight (RW) in g, root length (RL) in cm, grain weight (GW) in g.

Supplementary Table 4. Morpho-physiological and agronomical traits of Selected MR219 PLs under NS

| Genotypes | <i>qDTY/s</i>                                                                         | RL      | RW    | GW    |
|-----------|---------------------------------------------------------------------------------------|---------|-------|-------|
| UKM-G12   | <i>qDTY</i> <sub>12.1</sub> + <i>qDTY</i> <sub>3.1</sub> + <i>qDTY</i> <sub>2.2</sub> | 10.00d  | 0.68a | 1.67b |
| UKM-G13   | <i>qDTY</i> <sub>12.1</sub> + <i>qDTY</i> <sub>3.1</sub> + <i>qDTY</i> <sub>2.2</sub> | 13.15cd | 0.46a | 2.07a |
| UKM-G15   | <i>qDTY</i> <sub>3.1</sub> + <i>qDTY</i> <sub>2.2</sub>                               | 14.55bc | 0.70a | 2.28a |
| UKM-G14   | <i>qDTY</i> <sub>12.1</sub> + <i>qDTY</i> <sub>3.1</sub>                              | 15.75bc | 0.57a | 1.66b |
| MR219     | No <i>qDTY</i>                                                                        | 18.00ab | 1.58a | 1.59b |

Same letters in each column indicate non-significant different (LSD,  $p < 0.05$ ), root weight (RW) in g, root length (RL) in cm, grain weight (GW) in g.

Supplementary Table 5. Correlation between traits in MRQ74 PLs

| Traits | DTF    |        | PH     |       | NP    |        | CC     |       | RW     |       | RL     |       | LR    | GW    |       | GL   |       |  |
|--------|--------|--------|--------|-------|-------|--------|--------|-------|--------|-------|--------|-------|-------|-------|-------|------|-------|--|
|        | NS     | RS     | NS     | RS    | NS    | RS     | NS     | RS    | NS     | RS    | NS     | RS    | RS    | NS    | RS    | NS   | RS    |  |
| PH     | 0.51*  | 0.40*  |        |       |       |        |        |       |        |       |        |       |       |       |       |      |       |  |
| NP     | 0.25*  | 0.37*  | 0.38*  | 0.38* |       |        |        |       |        |       |        |       |       |       |       |      |       |  |
| CC     | -0.61* | -0.29* | -0.22* | -0.21 | -0.15 | -0.02  |        |       |        |       |        |       |       |       |       |      |       |  |
| RW     | 0.21   | 0.16   | 0.01   | 0.27* | 0.00  | 0.27*  | -0.41* | -0.18 |        |       |        |       |       |       |       |      |       |  |
| RL     | 0.21   | 0.16   | 0.01   | 0.21  | 0.00  | 0.14   | -0.42* | -0.18 | 0.99   | 0.68  |        |       |       |       |       |      |       |  |
| LR     | NA     | -0.03  | NA     | -0.07 | NA    | 0.02   | NA     | 0.07  | NA     | -0.11 | NA     | -0.15 |       |       |       |      |       |  |
| GW     | -0.17  | -0.29* | 0.14   | 0.09  | 0.04  | -0.34* | 0.32*  | 0.16  | -0.48* | -0.23 | -0.53* | -0.15 | -0.21 |       |       |      |       |  |
| GL     | 0.14   | -0.03  | 0.07   | 0.03  | 0.12  | -0.09  | -0.02  | 0.23  | -0.12  | -0.03 | -0.12  | -0.09 | -0.17 | -0.01 | 0.27* |      |       |  |
| GY     | 0.46*  | 0.46*  | 0.35*  | 0.61* | 0.46* | 0.68*  | -0.22  | -0.23 | 0.22   | 0.26* | 0.23   | 0.15  | -0.10 | -0.06 | -0.12 | 0.05 | -0.13 |  |

\*Significant at  $p < 0.05$ , days to flowering (DTF), plant height (PH) in cm, number of panicles (NP), chlorophyll content (CC), leaf rolling (LR), root weight (RW) in g, root length (RL) in cm, grain weight (GW) in g, grain length (GL) in cm, grain yield (GY) in  $\text{kg ha}^{-1}$ .

Supplementary Table 6. Correlation between traits in MR219 PLs

| Traits | DTF    |        | PH    |       | NP    |       | CC    |        | RW    |       | RL   |       | LR    | GW    |       |  |
|--------|--------|--------|-------|-------|-------|-------|-------|--------|-------|-------|------|-------|-------|-------|-------|--|
|        | NS     | RS     | NS    | RS    | NS    | RS    | NS    | RS     | NS    | RS    | NS   | RS    | RS    | NS    | RS    |  |
| PH     | 0.02   | 0.09   |       |       |       |       |       |        |       |       |      |       |       |       |       |  |
| NP     | -0.10  | -0.15  | 0.33* | 0.62* |       |       |       |        |       |       |      |       |       |       |       |  |
| CC     | -0.33* | -0.63* | 0.36* | -0.18 | -0.03 | 0.10  |       |        |       |       |      |       |       |       |       |  |
| RW     | 0.01   | 0.11   | 0.01  | 0.46* | -0.10 | 0.52* | 0.04  | -0.18  |       |       |      |       |       |       |       |  |
| RL     | 0.31*  | 0.23   | 0.01  | 0.40* | 0.02  | 0.24  | 0.05  | -0.34* | 0.06  | 0.23  |      |       |       |       |       |  |
| LR     | NA     | -0.25  | NA    | 0.22  | NA    | 0.31* | NA    | -0.06  | NA    | 0.23  | NA   | 0.09  |       |       |       |  |
| GW     | -0.27* | 0.07   | 0.32* | 0.34* | 0.26* | 0.20  | 0.39* | -0.15  | -0.11 | 0.08  | 0.00 | 0.15  | 0.28* |       |       |  |
| GY     | 0.20   | 0.25   | 0.45* | 0.51* | 0.42* | 0.35* | 0.20  | -0.43* | -0.10 | 0.33* | 0.06 | 0.37* | 0.03  | 0.34* | 0.25* |  |
| GL     | -0.07  | 0.04   | 0.00  | -0.03 | 0.07  | -0.12 | 0.00  | 0.00   | 0.29* | -0.11 | 0.04 | -0.12 | 0.11  | -0.12 | 0.06  |  |

\*Significant at  $p < 0.05$ , days to flowering (DTF), plant height (PH) in cm, number of panicles (NP), chlorophyll content (CC), leaf rolling (LR), root weight (RW) in g, root length (RL) in cm, grain weight (GW) in g, grain yield (GY) in  $\text{kg ha}^{-1}$ .
